# Supplementary material
Source: Springer Nature journal article supplement (https://www.springermedizin.de/resource/supplementary/12916_2013_981_MOESM1_ESM.pdf/9598756)
Supplement: MOESM1 [file 9598756]

**Supplementary Table 1:** Characteristics of the human pancreatic donors included in the DNA methylation array analysis.

---

|                          |            |
|--------------------------|------------|
| n (male/female)          | 13 (8/5)   |
| Age (years)              | 49 ± 16    |
| BMI (kg/m <sup>2</sup> ) | 26.4 ± 4.5 |
| Hba1c (%)*               | 5.4 ± 0.7  |

---

*Data are expressed as mean ± SD*

*\*Data available for 10 donors (7 males/3 females)*
